# Supplementary material for: A microporous nickel–organic framework with an unusual 10-connected bct net and high capacity for CO2, H2 and hydrocarbons
Source: Royal Society of Chemistry journal article supplement (doi:10.1039/c3ce40548f), 2013-01-01
Supplement: c3ce40548f.pdf [file c3ce40548f.pdf]

## Supporting Information

### **A microporous nickel-organic framework with unusual 10-connected bct net and high capacity for CO<sub>2</sub>, H<sub>2</sub> and hydrocarbons**

**Duan-Chuan Hou,<sup>a,b</sup> Gui-Yuan Jiang,<sup>b,\*</sup> Hong-Ru Fu,<sup>a</sup> Zhen Zhao<sup>b</sup> and Jian Zhang<sup>a,\*</sup>**

<sup>a</sup> *State Key Laboratory of Structural Chemistry, Fujian Institute of Research on the Structure of Matter, Chinese Academy of Sciences, Fuzhou, Fujian 350002, P. R. China. E-mail: zhj@fjirsm.ac.cn.*

<sup>b</sup> *State Key Laboratory of Heavy Oil Processing, China University of Petroleum, Beijing 102249, P. R. China. E-mail: jianggy@cup.edu.cn*

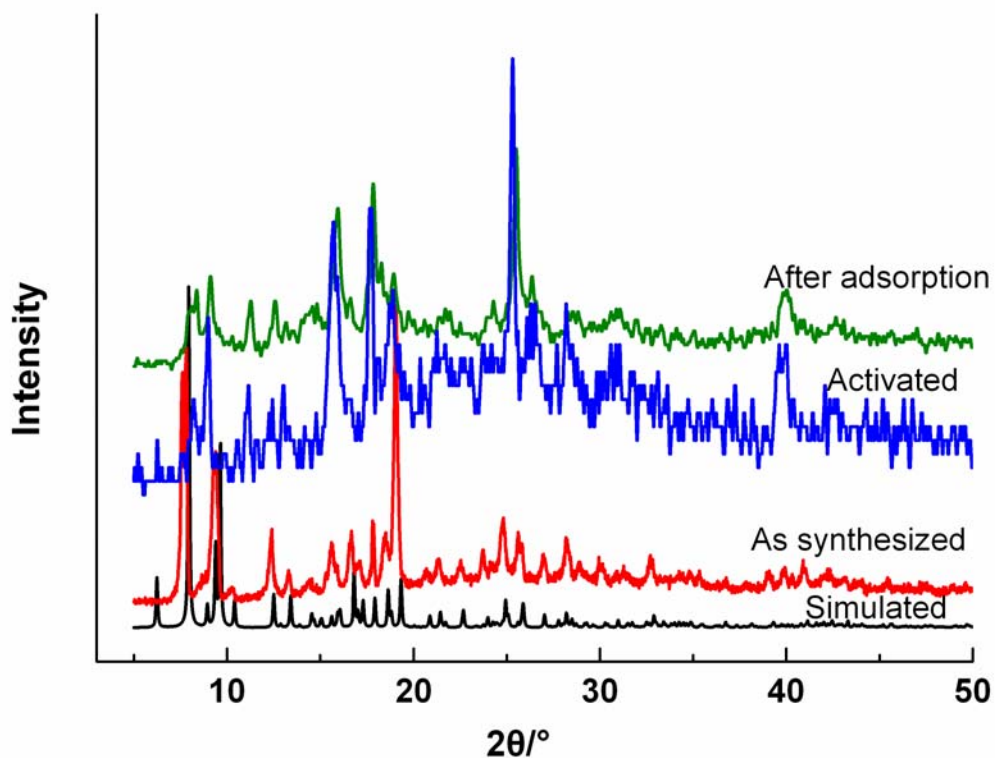

**Figure S1.** Simulated, synthesized, activated and after adsorption PXRD patterns of compound 1.

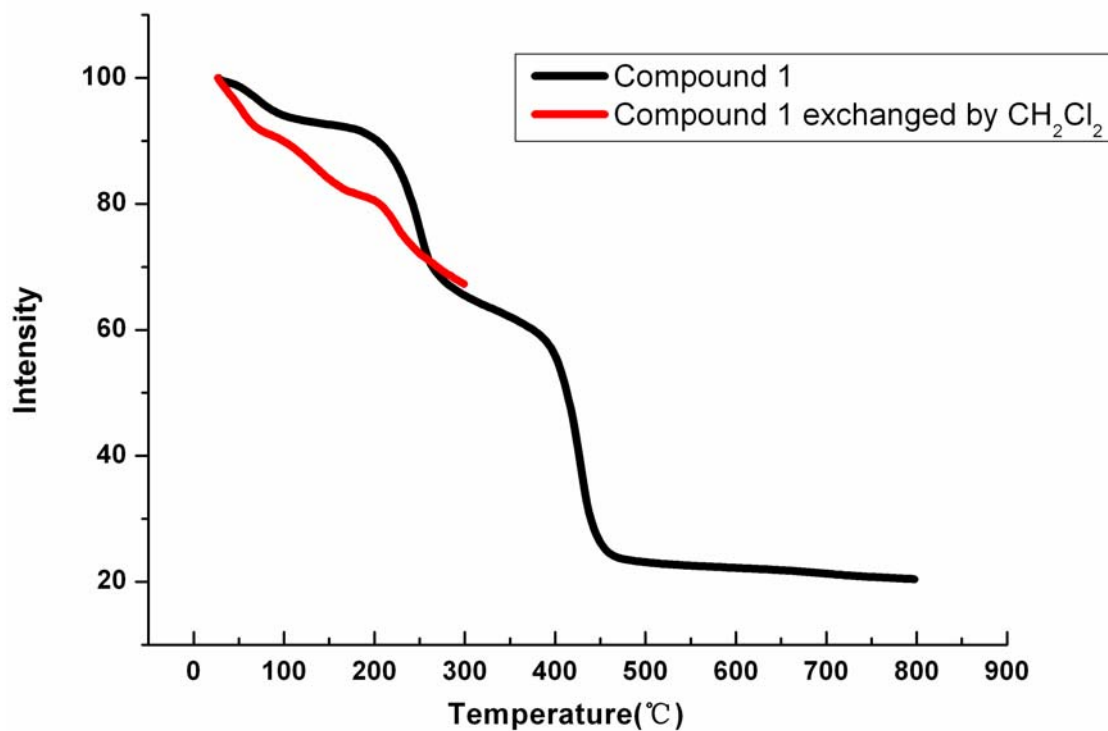

**Figure S2.** The TGA diagrams of **1** (black) and its sample soaked in  $\text{CH}_2\text{Cl}_2$  (red).

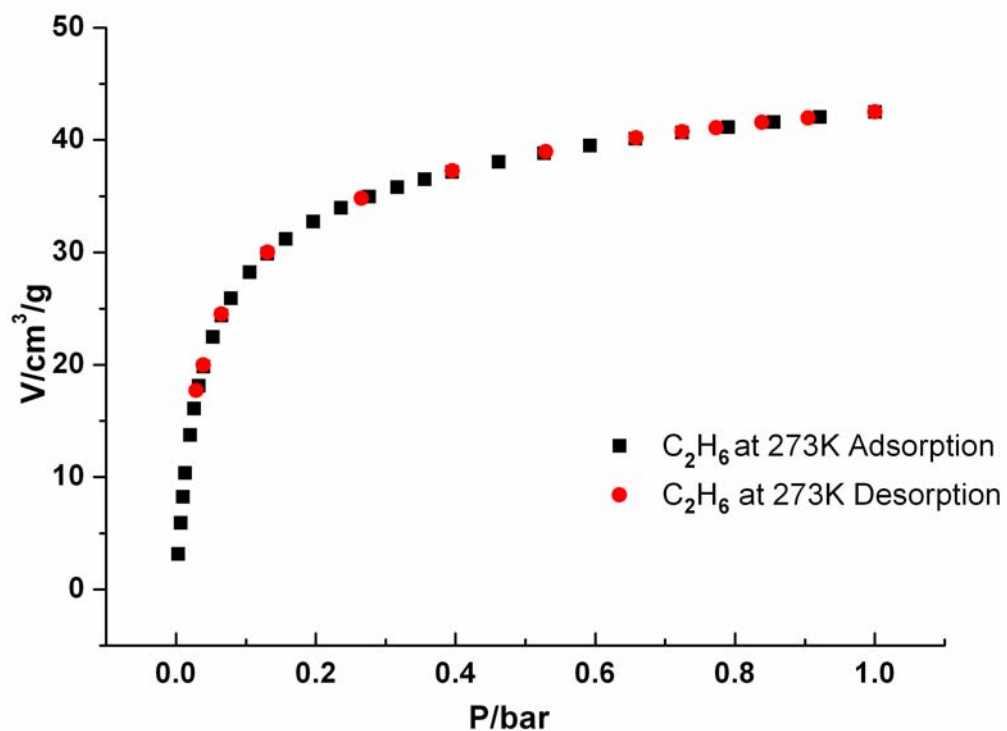

Figure S3. The  $C_2H_6$  adsorption and desorption isotherms of 1 at 273K.

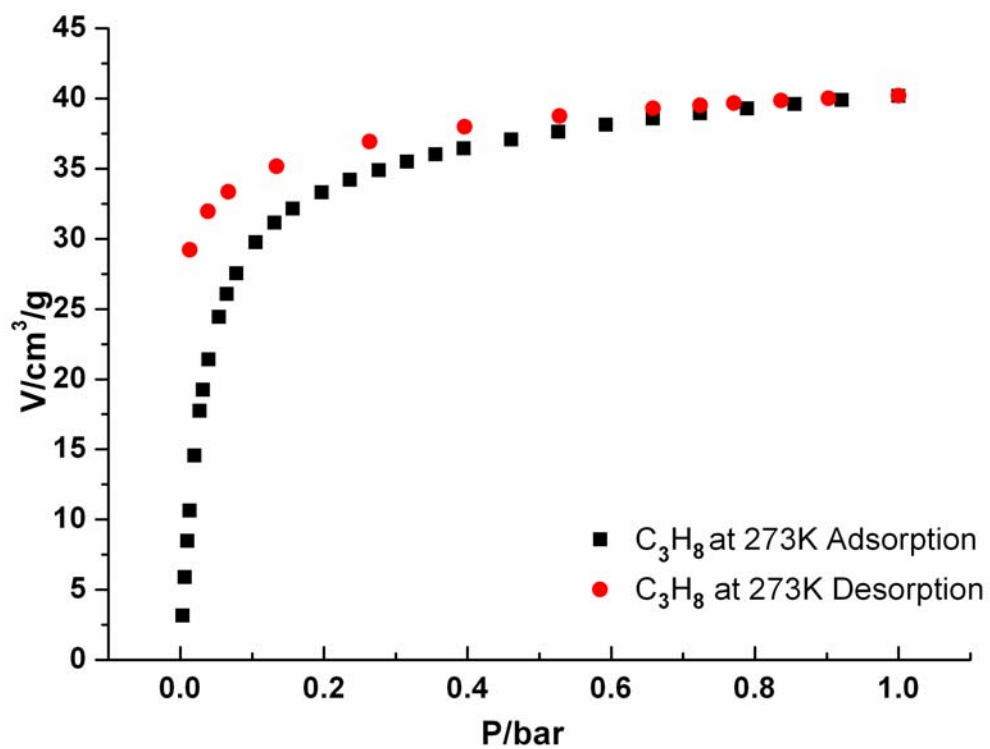

Figure S4. The  $C_3H_8$  adsorption and desorption of 1 at 273K.
